# Supplementary material for: Electron beam manipulation of gold nanoparticles external to the beam
Source: Royal Society of Chemistry journal article supplement (doi:10.1039/c4ra03350g), 2014-07-14
Supplement: c4ra03350g1.pdf [file c4ra03350g1.pdf]

## SUPPORTING INFORMATION

1. Fig. S1 shows the relation between average velocity and particle-to-beam distance under different particle size. Although there is no obvious difference of the results between various nanoparticle sizes, the general distribution for a single particle size still follows the negative sloped trend. Therefore, the negative sloped distribution of Fig. 4B and 4C is not caused by the particle size variation.

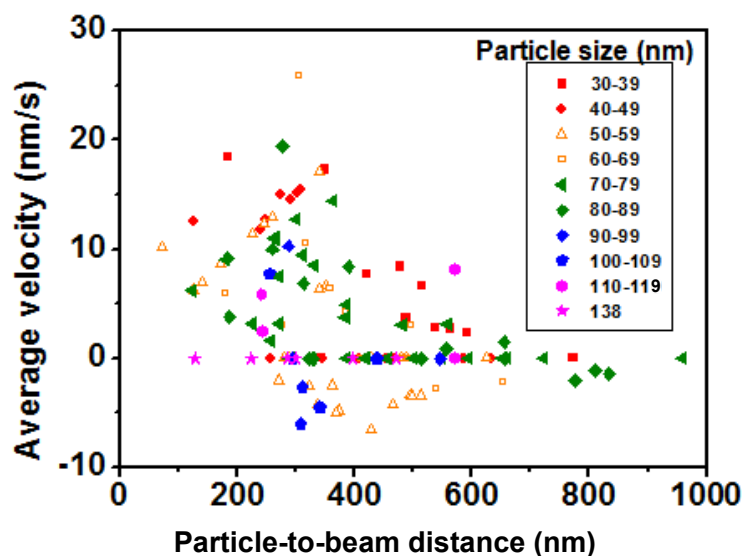

**Fig. S1** Plot of average particle velocity versus particle-to-beam distances at various particle sizes.

2. The diffusion time for ions to diffuse a whole window area

The observation window is a 150  $\mu\text{m}$  x 150  $\mu\text{m}$  square. The longest diffusion distance is the diagonal, which is approximately 200  $\mu\text{m}$ . Since the equation of diffusion length is:

$$l = (D \cdot t)^{1/2}$$

where  $l$  is the diffusion length, which is 200  $\mu\text{m}$  in this case, and  $D$  is the diffusion coefficient, which is on the order of  $10^{-5} \text{ cm}^2 \cdot \text{s}^{-1}$ . Therefore, the diffusion time,  $t$ , for the ions

to diffuse the whole observation window area is calculated as 40 s. And for diffusing a length of 900 nm, the largest e-beam effective distance observed in our experiment, it only takes about 1 ms.

3. Dielectrophoresis (or DEP) is a phenomenon in which a force is exerted on a polarizable particle when it is subjected to a non-uniform electric field.

From basic electrostatics, when placed in an external electrical field  $E$ , a conductive particle will develop charge re-distribution so as to eliminate any field inside the conductive particle. This will result an electrical dipole moment  $P$ , which is proportional to  $E$  and names as induced dipole moment, and will interact with the external field to lower the energy by  $E \cdot P$ . As a result, the interaction energy between the field and the dipole moment induced is proportional to  $E^2$ , the strength of electrical field squared.

Away from the e-beam, the force can be simplified as the derivative of this energy,

$$F \propto E \frac{\partial E}{\partial r} \propto r^{-3} \quad (r \geq R) \quad (3)$$

$F$  represents the force of the dipole suffered in the electric field  $E$ , and other notations are the same as in equation (1) and (2).
